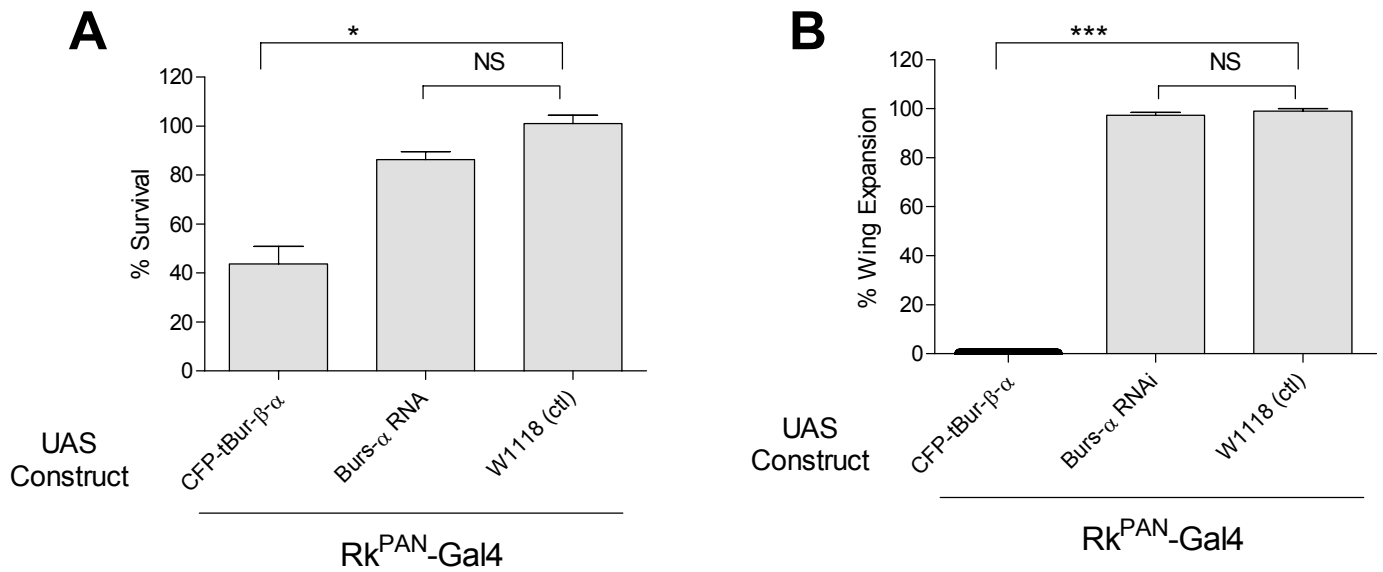

**Fig. S1. Expression of membrane tethered bursicon with RkPAN-Gal4 results in reduced survival and in wing expansion defects.** (A,B) Expression of CFP-tBur-β-α, but not Burs-α RNAi in rk expressing cells results in a reduction in survival through eclosion and wing expansion defects. Abbreviations: UAS= upstream activation sequence, CFP-tBur-β-α = cherry fluorescent protein membrane tethered bursicon, RkPAN= Gal4 expression under rk promoter sequence. Statistics: data represent mean + SEM of experiments done in triplicate. 134-143 progeny were counted for each independent cross. \*\*\* $P < 0.0001$ , \* $P < 0.05$ , NS  $P > 0.05$ . Data is normalized to 3 independent crosses of the indicated Gal4 lines with W1118 flies.
